# Supplementary material
Source: publisher site journal article supplement (https://www.dovepress.com/article/601718)
Supplement: Supplementary file 1 [file 601718%20Supplementary%20Material.docx]

| **Table S1. Correlation Analysis (n = 119)** | | | | | | | | | | | | |
| --- | --- | --- | --- | --- | --- | --- | --- | --- | --- | --- | --- | --- |
| **A. Correlation Between Composite Scores** | | | | | | | | | | | | |
|  | | **Knowledge Score** | | | | | | **Appropriateness Score** | | | | |
| **Knowledge Score** | | 1.00 | | | | | | 0.10 | | | | |
| **Appropriateness Score** | | 0.10 | | | | | | 1.00 | | | | |
| *Pearson correlation coefficient. p=0.262 (not significant)* | | | | | | | | | | | | |
| **B. Item-Level Correlation Matrix** | | | | | | | | | | | |
| Item | 1 | | 2 | 3 | 4 | 5 | 6 | | 7 | 8 | 9 |
| 1. Respiratory risk | 1.00 | | 0.36* | 0.23* | -0.12 | -0.04 | 0.01 | | 0.06 | 0.02 | -0.05 |
| 2. C. difficile risk | 0.36* | | 1.00 | 0.45* | -0.04 | 0.07 | 0.22* | | 0.21* | -0.12 | -0.18 |
| 3. Osteoporosis risk | 0.23* | | 0.45* | 1.00 | -0.04 | 0.13 | 0.09 | | 0.13 | -0.01 | -0.15 |
| 4. DDI awareness | -0.12 | | -0.04 | -0.04 | 1.00 | -0.16 | -0.09 | | 0.16 | -0.00 | 0.16 |
| 5. Coagulopathy | -0.04 | | 0.07 | 0.13 | -0.16 | 1.00 | 0.22* | | -0.00 | -0.30* | -0.14 |
| 6. Burns ≥35% | 0.01 | | 0.22* | 0.09 | -0.09 | 0.22* | 1.00 | | -0.25* | -0.31* | -0.37* |
| 7. MV <24h | 0.06 | | 0.21* | 0.13 | 0.16 | -0.00 | -0.25* | | 1.00 | 0.06 | 0.15 |
| 8. DAPT | 0.02 | | -0.12 | -0.01 | -0.00 | -0.30* | -0.31* | | 0.06 | 1.00 | 0.48* |
| 9. Steroids | -0.05 | | -0.18 | -0.15 | 0.16 | -0.14 | -0.37* | | 0.15 | 0.48* | 1.00 |
| *Pearson correlation coefficients. *p<0.05 (statistically significant). Items 1-4 are knowledge items (PPI risks); items 5-9 are appropriateness items (SUP indications/non-indications).* | | | | | | | | | | | |

| **Table S2. Comparison of Scores by Gender (n = 119)** | | | | |
| --- | --- | --- | --- | --- |
| **Gender** | **n** | **Knowledge Score** | **Appropriateness Score** | **Overall Competency** |
| Female | 49 | 3.20 ± 0.51 | 2.80 ± 0.38 | 2.98 ± 0.31 |
| Male | 70 | 3.38 ± 0.73 | 2.88 ± 0.40 | 3.10 ± 0.42 |
| *Values presented as Mean ± SD. Independent t-test results: Knowledge Score (t=-1.45, p=0.151), Appropriateness Score (t=-1.04, p=0.301), Overall Competency (t=-1.71, p=0.091). Scores range from 1-5, with higher scores indicating better performance.* | | | | |
